# Supplementary material for: Temperature-Dependent Structural and Electrical Properties of Metal-Organic CVD MoS2 Films
Source: MDPI journal article supplement (doi:10.3390/nano13192712), 2023-10-06

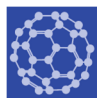

Supporting Information

# Temperature-Dependent Structural and Electrical Properties of Metal-Organic CVD MoS<sub>2</sub> Films

Roman I. Romanov <sup>1</sup>, Ivan V. Zabrosaev <sup>1</sup>, Anastasia A. Chouprik <sup>1</sup>, Dmitry I. Yakubovsky <sup>2</sup>, Mikhail K. Tatmyshevskiy <sup>2</sup>, Valentyn S. Volkov <sup>2</sup> and Andrey M. Markeev <sup>1,\*</sup>

<sup>1</sup> Center of Shared Research Facilities, Moscow Institute of Physics and Technology (National Research University), Dolgoprudny 141701, Russia; romanov.ri@mipt.ru (R.I.R.); zabrosaev@phystech.edu (I.V.Z.); chouprik.aa@mipt.ru (A.A.C.)

<sup>2</sup> Center for Photonics & 2D Materials, Moscow Institute of Physics and Technology (National Research University), Dolgoprudny 141700, Russia dmitrii.yakubovskii@phystech.edu (D.I.Y.); mikhail.tatmyshevskiy@phystech.edu (M.K.T.); volkov.vs@mipt.ru (V.S.V.)

\* Correspondence: markeev.am@mipt.ru; Tel.: +7-(919)-411-6809

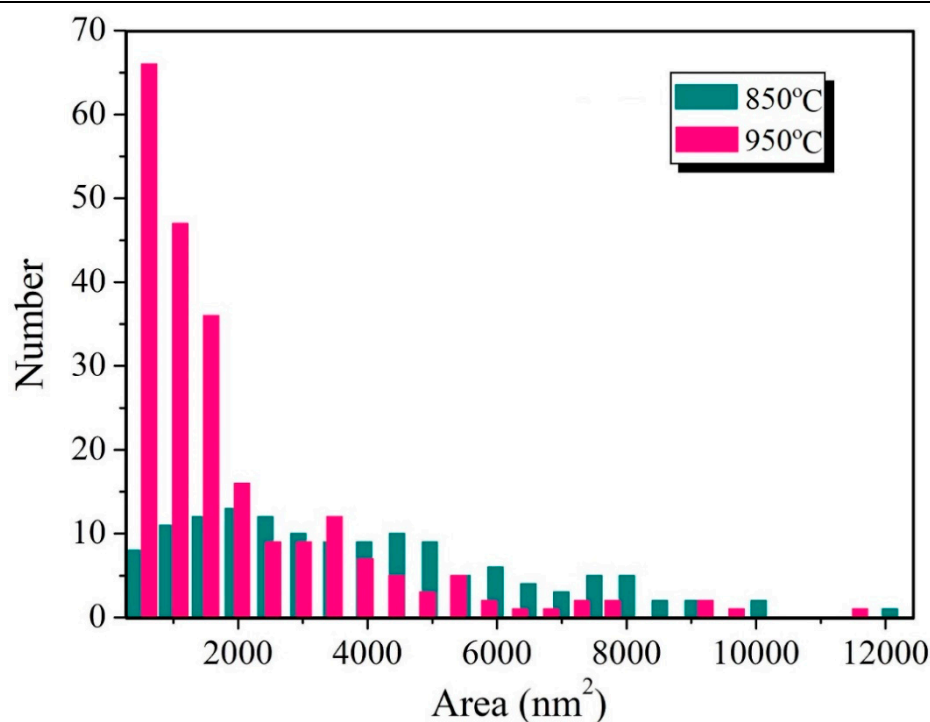

**Figure S1.** Crystallite size distribution histogram for MoS<sub>2</sub> samples deposited at 850 °C and 950 °C.

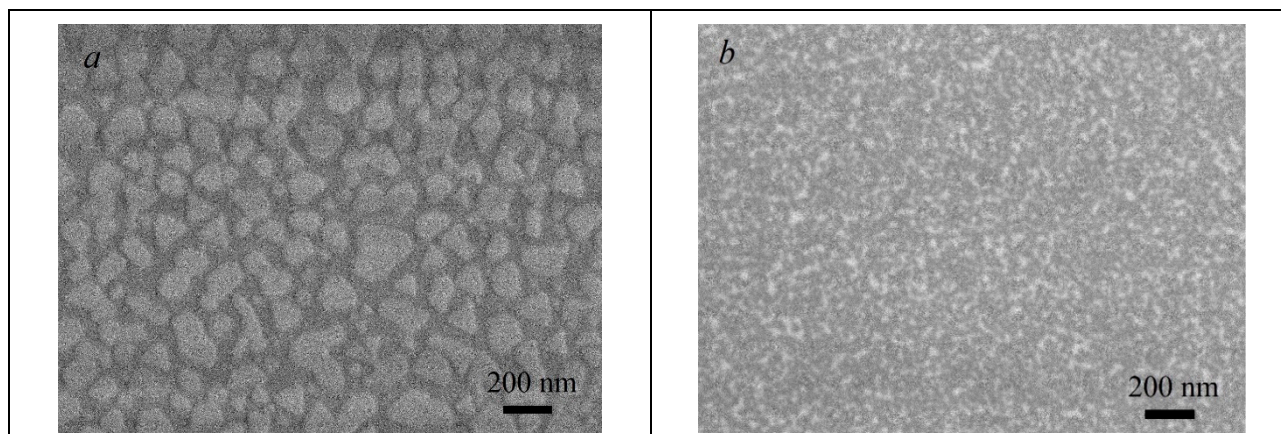

**Figure S2-** SEM-images of MoS<sub>2</sub> films' surface, deposited at 950 °C for 9 hours (a) and at 650 °C for 6 hours (b). The brighter regions correspond to thicker film grains, darker background to the thinner underlying film.

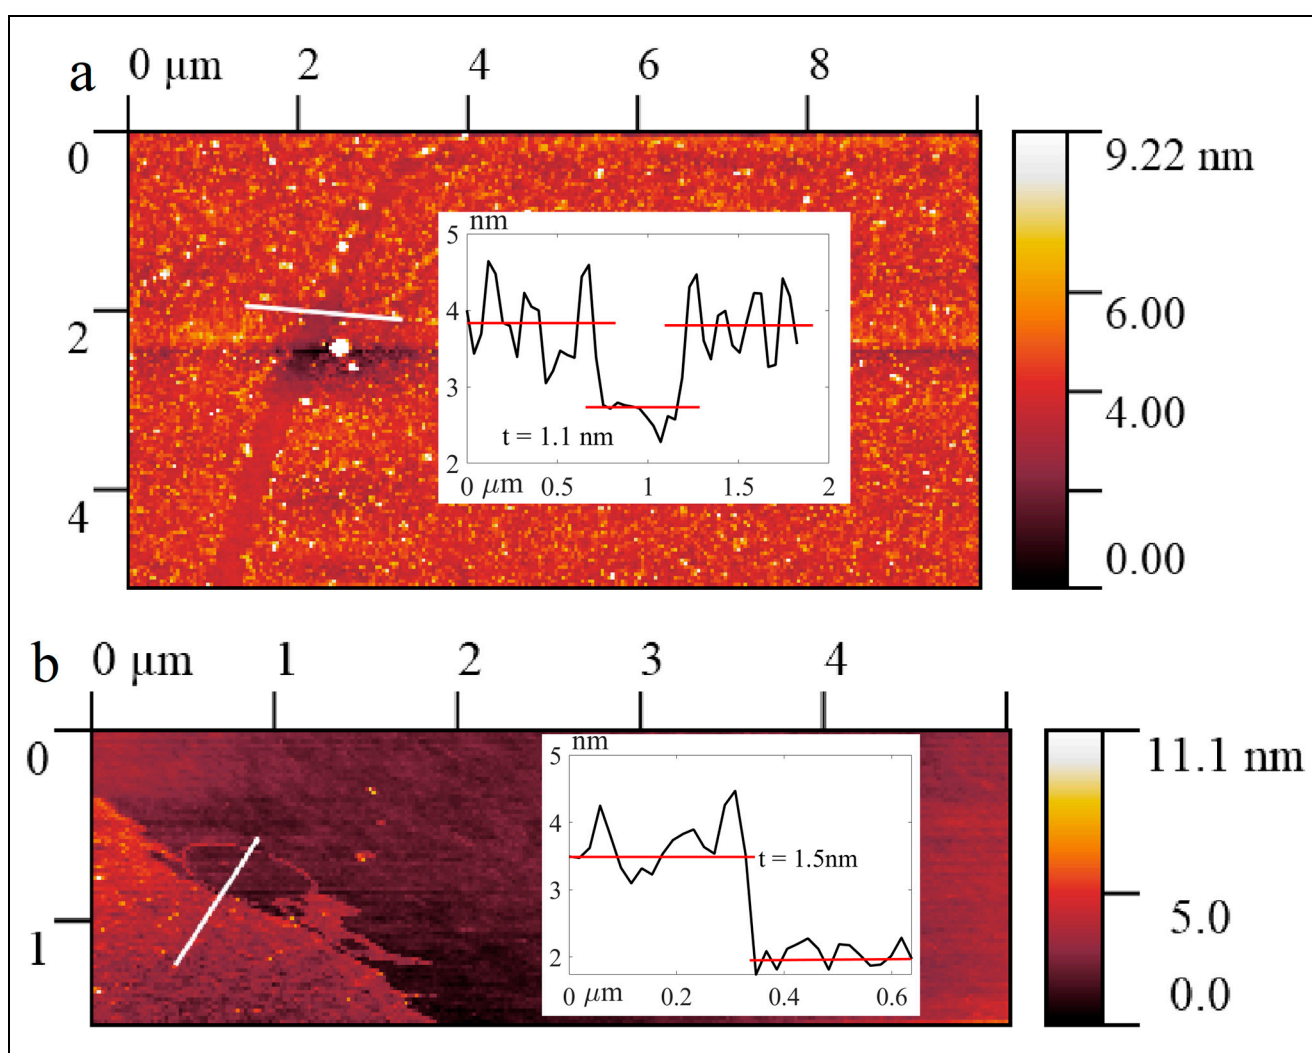

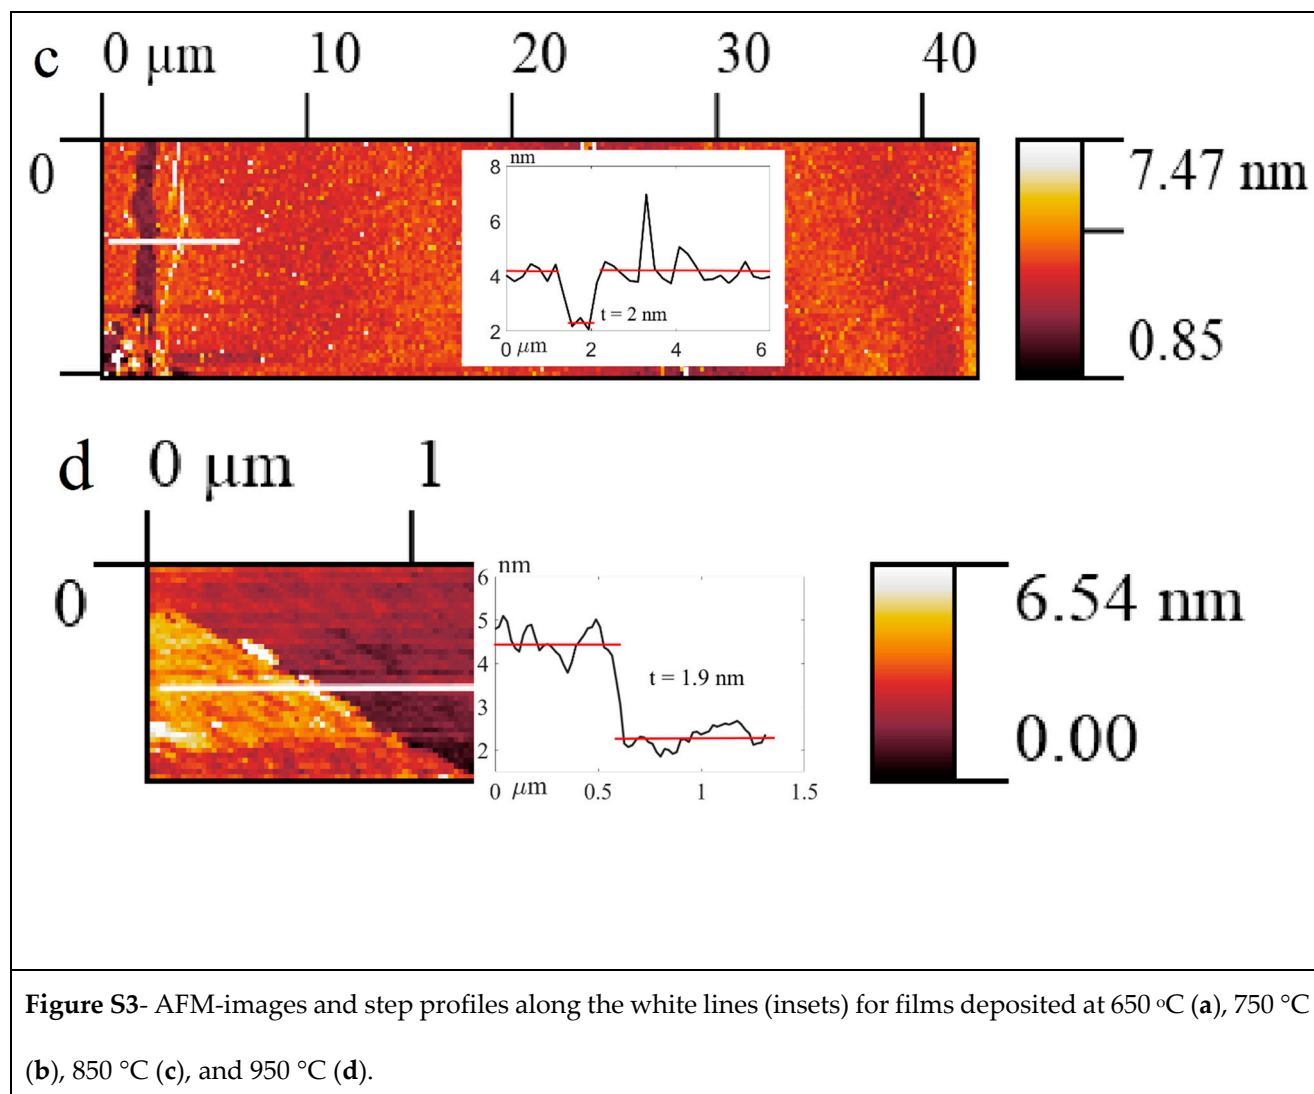

Supplement: s1 [file s1]
